# Supplementary material for: Degradation of pyrene in contaminated soil by the dielectric barrier discharge combined with the MnFe2O4 catalyst
Source: Royal Society of Chemistry journal article supplement (doi:10.1039/d2ra06251h), 2022-01-01
Supplement: d2ra06251h1.pdf [file d2ra06251h1.pdf]

1

## Supplementary Material

2 **Degradation of Pyrene in Contaminated Soil by the Dielectric Barrier**

3 **Discharge combined with the MnFe<sub>2</sub>O<sub>4</sub> catalyst**

4 Zixu Zeng,<sup>a</sup> Yani Zhang,<sup>a</sup> Xianlun Xu,<sup>a</sup> Shaoyun Hao,<sup>a</sup> Lecheng Lei,<sup>ab</sup> and Xingwang Zhang,<sup>\*ab</sup>

5 <sup>a</sup> Key Laboratory of Biomass Chemical Engineering of Ministry of Education, College of Chemical and  
6 Biological Engineering, Zhejiang University, Hangzhou 310027, China

7 <sup>b</sup> Institute of Zhejiang University-Quzhou, Weier Road, Quzhou 324000, China

8 \* Corresponding author. E-mail: xwzhang@zju.edu.cn

9

10 The degradation efficiency is calculated as follows:

$$\text{Degradation efficiency} = \frac{C_0 - C}{C_0} \times 100\% \quad (\text{Eq. S1})$$

12 Where  $C_0$  and  $C$  are the initial concentration (at time 0) and the momentary concentrations (at time  $t$ ), respectively.  
13 In the experiment, the V-q Lissajous graph method (V-q trajectory method) was used to measure the electrical  
14 parameters such as discharge power. The formula for calculating the current flowing through the loop and the  
15 discharge power during discharge is as follows:

16 Power  $E$  for a single cycle

$$E = \int_0^T U(t)I(t)dt = \int_0^T U(t) \frac{dQ(t)}{dt} dt = \int_0^T U(t)dQ(t) \quad (\text{Eq. S2})$$

18 Where  $U$  is the voltage across the additional capacitor,  $I$  is the current across the additional capacitor.  
19 Further calculation to obtain the power  $P$  of the reactor:

$$P = f \times E \quad (\text{Eq. S3})$$

21 Where  $f$  is the frequency of the pulse power, and  $E$  is the single cycle power.

22 The energy efficiency ( $G$ ) calculation is defined as follows:

$$G = \frac{m}{P \times t} \quad (\text{Eq. S4})$$

24 Where  $P$  is the power of the reactor, and  $t$  is time of treatment.

25 Table S1 Distribution of elements on MnFe<sub>2</sub>O<sub>4</sub>

| Element | Weight percentage | Atomic percentage |
|---------|-------------------|-------------------|
| Mn      | 26.50             | 17.22             |
| Fe      | 51.02             | 32.62             |
| O       | 22.48             | 50.16             |

|     |     |     |
|-----|-----|-----|
| All | 100 | 100 |
|-----|-----|-----|

26

27 Table S2 The kinetics parameters and G at spinel oxide

| Group                            | k (min <sup>-1</sup> ) | R <sup>2</sup> | G (mg/kJ) |
|----------------------------------|------------------------|----------------|-----------|
| Without catalyst                 | 0.01436                | 0.9825         | 0.8410    |
| CuFe <sub>2</sub> O <sub>4</sub> | 0.02124                | 0.9849         | 1.0200    |
| MnFe <sub>2</sub> O <sub>4</sub> | 0.02677                | 0.9776         | 1.0306    |

28 Table S3 Effect of soil pH on pyrene degradation: Degradation efficiency of pyrene with different pH in 10 minutes.

| pH   | Degradation Efficiency (%) | Energy Efficiency (g/kWh) |
|------|----------------------------|---------------------------|
| 2.7  | 61.0                       | 0.57                      |
| 7.3  | 77.0                       | 0.72                      |
| 11.7 | 78.4                       | 0.73                      |

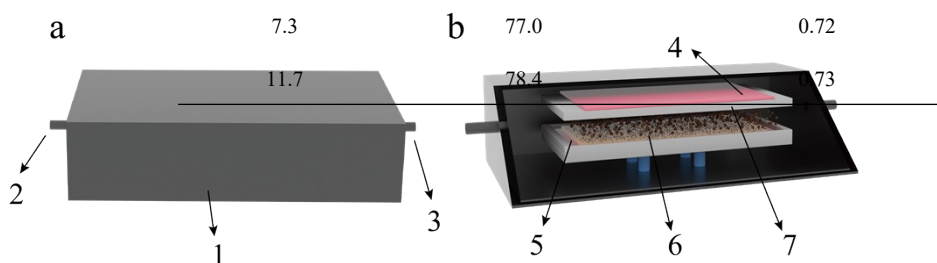

31

32 (1) Shell; (2) Air inlet; (3) Air outlet; (4) High voltage electrode; (5) Low voltage electrode; (6) Contaminated soil; (7) Quartz glass

33 Fig. S1 Reaction system diagram: (a) Main body of the reaction system, (b) Cross-sectional view of the reaction system.

34

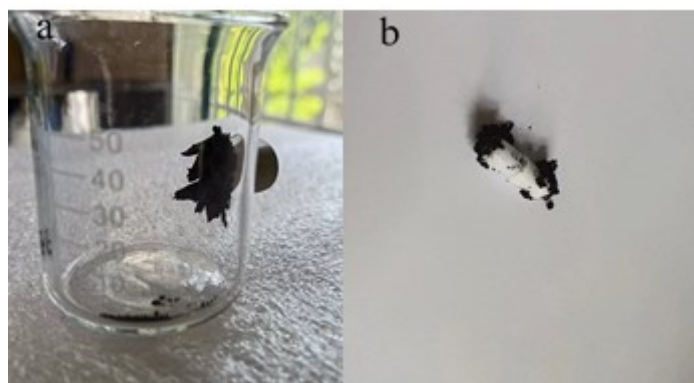

35

36 Fig. S2 MnFe<sub>2</sub>O<sub>4</sub> catalyst. (a) MnFe<sub>2</sub>O<sub>4</sub> caught by a magnet, (b) MnFe<sub>2</sub>O<sub>4</sub> caught by a magnetic stirrer.

37 Fig. S2 proved that the MnFe<sub>2</sub>O<sub>4</sub> catalyst could be strongly attracted by a magnet, so it could be easily  
38 absorbed by the magnetic force.

39

40

41

42

43

44

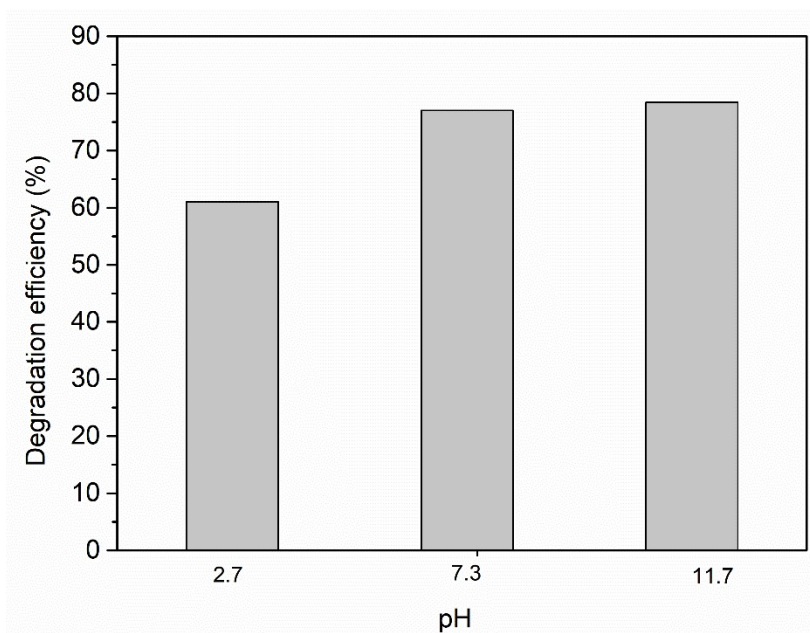

45

46

Figure S3 The effect of pH on degradation efficiency of pyrene.

47
